# Supplementary material for: The HNF4A R76W mutation causes atypical dominant Fanconi syndrome in addition to a β cell phenotype
Source: PubMed Central journal article supplement — J Med Genet. 2013 Nov 27;51(3):165–9. doi: 10.1136/jmedgenet-2013-102066 (PMC3932761; doi:10.1136/jmedgenet-2013-102066), 2013-11-27

1) Modelling images demonstrate differences in charge (left panel) and hydrophobicity (right panel) in areas of the R76W HNF4A homodimer where DNA binding occurs, compared to wild type.

Supplementary figure 3.

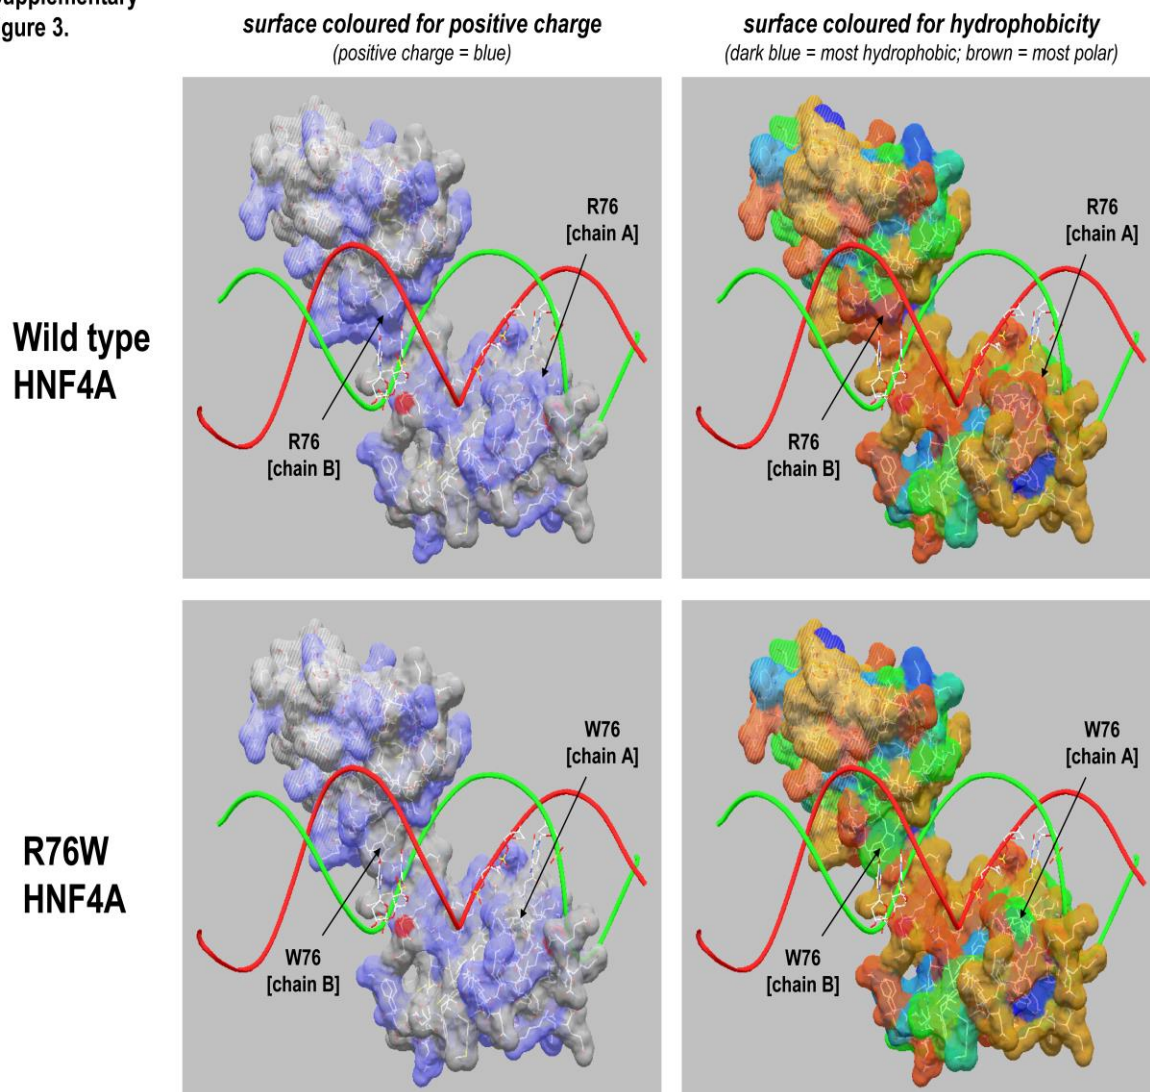

2) Expanded detail around the R76 residue coloured for positive charge. Modelling performed using Swissmodel PDB viewer.

*expanded detail around residue R76/W76, coloured for positive charge*

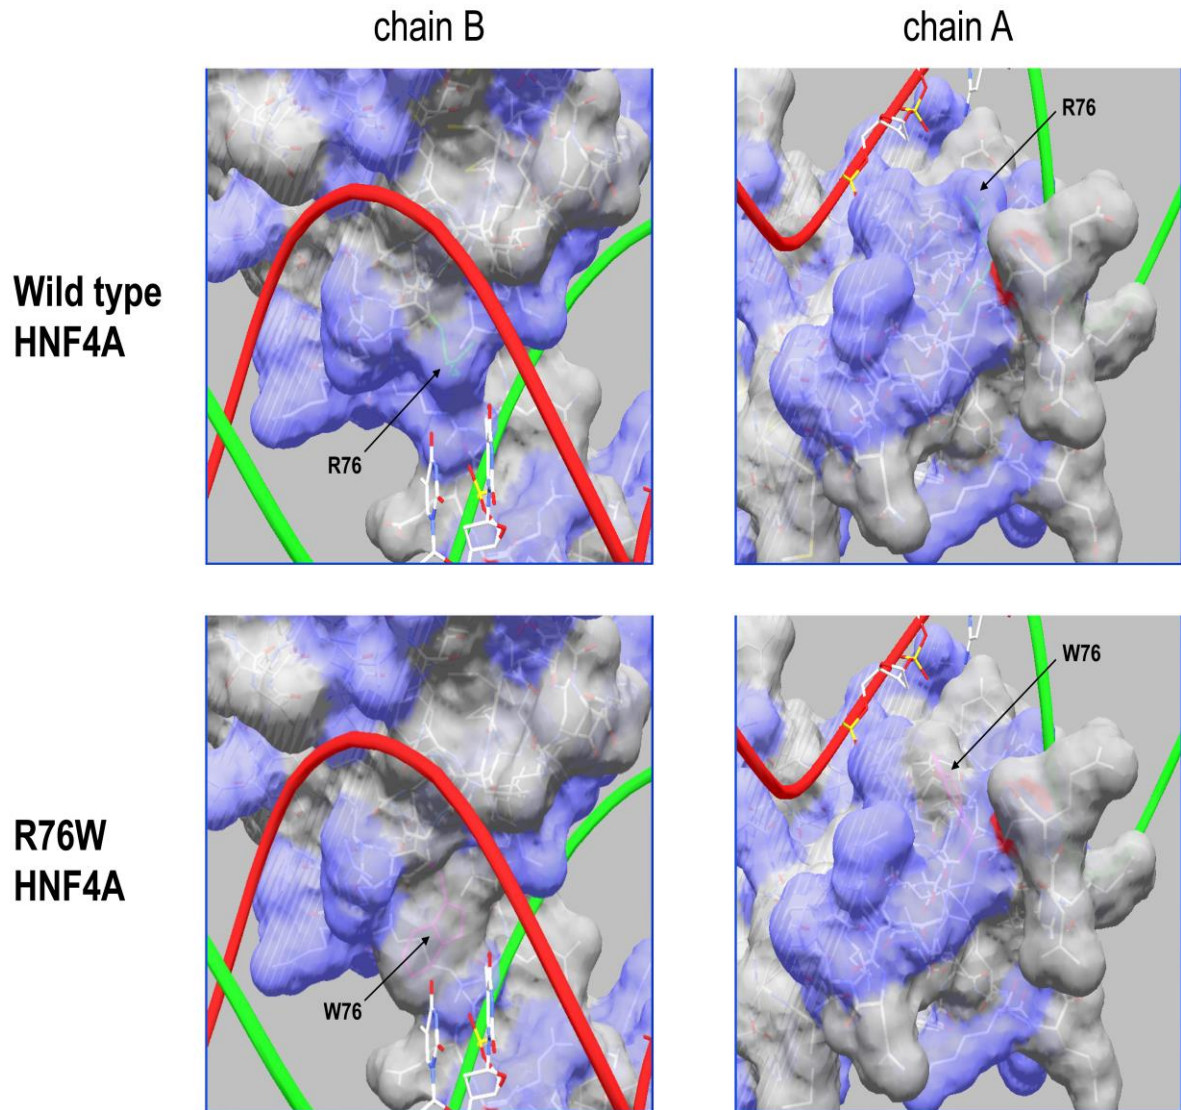

Supplement: jmedgenet-2013-102066-s1.pdf [file jmedgenet-2013-102066-s1.pdf]
