# Supplementary material for: The HNF4A R76W mutation causes atypical dominant Fanconi syndrome in addition to a β cell phenotype
Source: PubMed Central journal article supplement — J Med Genet. 2013 Nov 27;51(3):165–9. doi: 10.1136/jmedgenet-2013-102066 (PMC3932761; doi:10.1136/jmedgenet-2013-102066), 2013-11-27
Supplement: jmedgenet-2013-102066-s2.pdf [file jmedgenet-2013-102066-s2.pdf]

|                                      |                                  | Variable Units                         | R76W                         |        |             | Other <i>HNF4A</i> |                    |             | P value    |         |
|--------------------------------------|----------------------------------|----------------------------------------|------------------------------|--------|-------------|--------------------|--------------------|-------------|------------|---------|
|                                      |                                  |                                        | n                            | Median | IQR         | n                  | Median             | IQR         |            |         |
| Features of a renal Fanconi syndrome | Low molecular weight proteinuria | Urinary $\alpha$ -1 microglobulin mg/L | 6                            | 205    | 83.5-287.8  | 20                 | 6.0                | 6.0-6.8     | 0.00005    |         |
|                                      |                                  | Urinary $\beta$ -2 microglobulin mg/L  | 6                            | 62.0   | 36.0-87.4   | 20                 | 0.3                | 0.1-0.3     | 0.0001     |         |
|                                      |                                  | Urinary retinol binding protein mg/L   | 6                            | 100.5  | 56.3-150.5  | 20                 | 2.0                | 2.0-2.0     | 0.000003   |         |
|                                      | Hypouricaemia                    | Serum urate $\mu$ mol/L                | 4                            | 96.0   | 84.8-108.0  | 16                 | 268.0              | 233.3-321.3 | 0.002      |         |
|                                      | Glycosuria                       | Serum glucose mmol/L                   | 6                            | 4.8    | 3.4-11.2    | 17                 | 7.2                | 5.3-9.8     | 0.2        |         |
|                                      |                                  | Urine glucose mmol/L                   | 6                            | 55.7   | 37.6-119.6  | 20                 | 0.3                | 0.3-1.5     | 0.001      |         |
|                                      | Phosphaturia                     | Serum phosphate mmol/L                 | 6                            | 1.09   | 0.73-1.22   | 18                 | 1.15               | 1.03-1.27   | 0.4        |         |
|                                      |                                  | Urinary phosphate:creatinine mmol/mol  | 6                            | 4.22   | 2.98-6.07   | 20                 | 2.1                | 1.5-3.0     | 0.009      |         |
|                                      | Renal tubular acidosis           | Serum bicarbonate mmol/L               | 6                            | 22.0   | 20.3-26.3   | 18                 | 23.4               | 22.2-24.5   | 0.5        |         |
|                                      | Additional/atypical features     | Renal function                         | Serum creatinine $\mu$ mol/L | 6      | 114.0       | 82.5-146.0         | 20                 | 84.0        | 67.8-102.8 | 0.03    |
| Other biochemistry                   |                                  | Serum magnesium mmol/L                 | 5                            | 1.10   | 0.91-1.16   | 18                 | 0.82               | 0.77-0.88   | 0.01       |         |
|                                      |                                  | Urinary magnesium:creatinine mmol/mol  | 6                            | 0.69   | 0.49-1.04   | 20                 | 0.4                | 0.34-0.5    | 0.02       |         |
|                                      |                                  | Urinary oxalate:creatinine mmol/mol    | 6                            | 0.050  | 0.040-0.125 | 20                 | 0.034              | 0.028-0.046 | 0.03       |         |
|                                      |                                  | Serum calcium mmol/L                   | 6                            | 2.14   | 2.01-2.22   | 18                 | 2.39               | 2.31-2.47   | 0.001      |         |
|                                      |                                  | Urinary calcium:creatinine mmol/mol    | 6                            | 0.97   | 0.47-1.15   | 20                 | 0.5                | 0.38-0.65   | 0.05       |         |
|                                      |                                  | Serum PTH pmol/L                       | 5                            | 4.4    | 4.3-4.8     | 17                 | 3.0                | 2.1-4.0     | 0.002      |         |
|                                      |                                  |                                        |                              | R76W   |             |                    | Other <i>HNF4A</i> |             |            | P value |
| Imaging                              |                                  | Nephrocalcinosis on renal ultrasound   | 5                            | 5/5    |             | 10                 | 0/10               |             | 0.0003     |         |

Supplementary Table 1. Comparison of biochemical and radiological features between patients with the R76W mutation and patients with other HNF4A mutations

| Urinary amino acid<br>umol/mmol Cr | R76W (n=6) |              | Other HNF4A (n=15) |             | p value |
|------------------------------------|------------|--------------|--------------------|-------------|---------|
|                                    | Median     | IQR          | Median             | IQR         |         |
| Hydroxyproline                     | 79.5       | 54.0-107.8   | 6.0                | 3.0-9.0     | 0.001*  |
| Proline                            | 69.0       | 47.5-143.3   | 1.0                | 1.0-3.0     | 0.0004* |
| Phosphoethanolamine                | 2.5        | 0.75-5.75    | 2.0                | 1.0-5.0     | 0.9     |
| Threonine                          | 138.0      | 69.8-265.5   | 18.0               | 11.0-30.0   | 0.002*  |
| Serine                             | 149.5      | 90.0-221.8   | 34.0               | 30.0-56.0   | 0.02    |
| Asparagine                         | 48.5       | 26.0-140.0   | 16.0               | 8.0-30.0    | 0.06    |
| Glutamic acid                      | 195.5      | 86.5-220.3   | 3.0                | 2.0-5.0     | 0.0004* |
| Glutamine                          | 137.0      | 80.3-233.3   | 37.0               | 16.0-61.0   | 0.002*  |
| Glycine                            | 1101.5     | 957.5-1428.5 | 197.0              | 105.0-310.0 | 0.0005* |
| Alanine                            | 231.0      | 162.5-349.0  | 50.0               | 26.0-80.0   | 0.001*  |
| Citrulline                         | 61.5       | 38.0-144.0   | 1.0                | 1.0-2.0     | 0.0002* |
| Valine                             | 17.5       | 3.8-33.8     | 3.0                | 2.0-5.0     | 0.01    |
| Cystine                            | 97.5       | 75.0-137.0   | 5.0                | 4.0-10.0    | 0.0004* |
| Methionine                         | 5.5        | 4.0-7.8      | 5.0                | 4.0-7.0     | 0.5     |
| Isoleucine                         | 3.0        | 0.8-6.5      | 3.0                | 2.0-5.0     | 1.0     |
| Leucine                            | 15.0       | 9.3-45.0     | 7.0                | 5.0-8.0     | 0.005   |
| Tyrosine                           | 23.0       | 13.3-43.8    | 10.0               | 8.0-19.0    | 0.02    |
| Phenylalanine                      | 17.0       | 8.0-31.3     | 7.0                | 4.0-11.0    | 0.03    |
| Ornithine                          | 93.5       | 51.3-184.8   | 2.0                | 1.0-3.0     | 0.0004* |
| Lysine                             | 400.5      | 329.3-780.3  | 14.0               | 11.0-30.0   | 0.0004* |
| Histidine                          | 243.0      | 137.3-282.3  | 73.0               | 31.0-96.0   | 0.001*  |
| Tryptophan                         | 6.5        | 3.3-15.3     | 4.0                | 2.0-10.0    | 0.5     |
| Arginine                           | 64.5       | 23.8-92.3    | 2.0                | 1.0-3.0     | 0.0004* |
| <b>Mean Z score</b>                | 22.9       |              | 0.2                |             |         |

Supplementary Table 2. Comparison of urinary amino acids between patients with R76W mutation and patients with other HNF4A mutations

Data are median (umol/mmol creatinine).

P-value calculated using Mann Whitney U test.

\*Significance after a Bonferroni correction for analysing 23 amino acids,  $P < 0.002$ .
